# Supplementary material for: Chronic Exposure to the Food Additive tBHQ Modulates Expression of Genes Related to SARS-CoV-2 and Influenza Viruses
Source: MDPI journal article supplement (doi:10.3390/life12050642), 2022-04-26
Supplement: s1 [file s1]

**Supplementary Figure S1. Change in body weight over treatment time.** Mice were maintained on food pellets supplemented with 1.5% (w/w) tBHQ or vehicle for 20 days. Weight of animals is expressed as percentage of original body weight measured at the first day of the treatment period. Data are means  $\pm$  SD of 6-6 mice/group

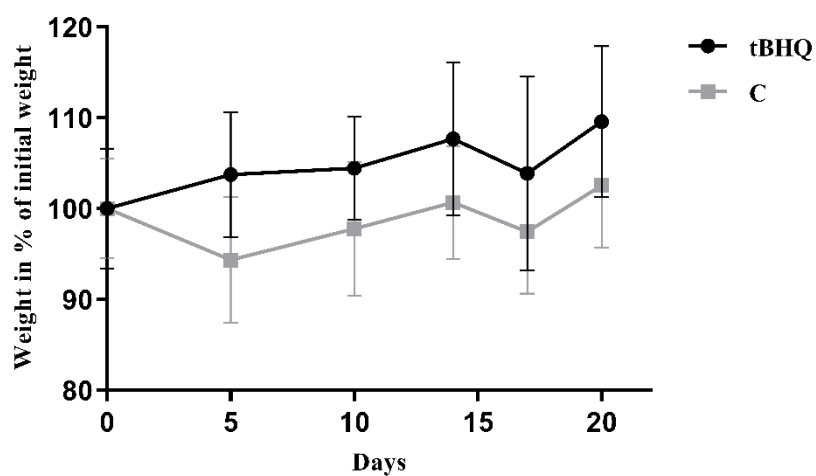

**Supplementary Figure S2. Representative scatter plot of CD3<sup>+</sup> positivity of CD4<sup>+</sup> cells.**

CD4<sup>+</sup> cells were isolated from splenocytes derived from tBHQ fed and control mice with magnetic separation. CD3 positivity of these cells were determined with FACS analysis.

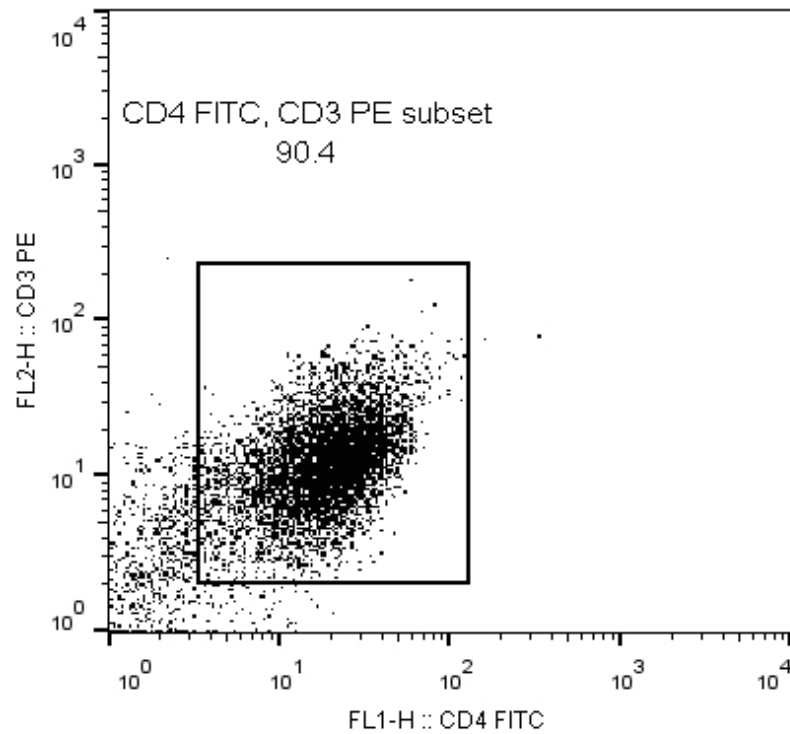

**Supplementary Figure S3. Correlation between cDNA microarray and RT-PCR data.**

The fold changes in transcript levels of 47 selected genes determined by both methods were log<sub>2</sub> transformed, and the values were plotted against each other to evaluate their correlation.

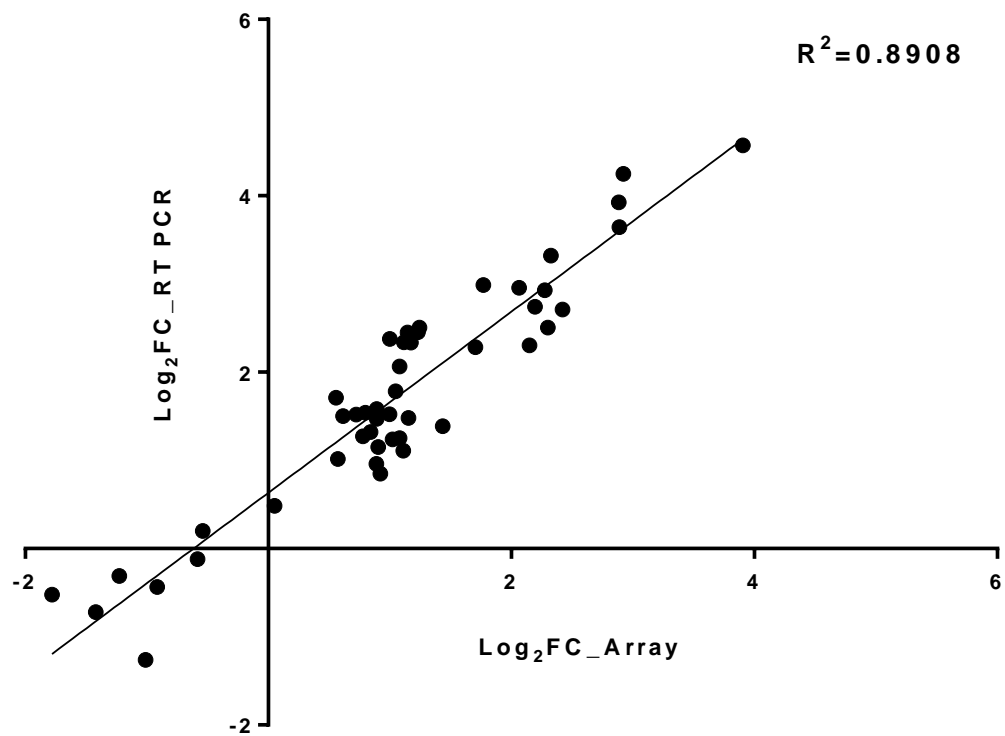

**Supplementary Table S1. List of significantly changed genes after per os tBHQ treatment measured with Agilent microarray.** In total 269 genes were found with a significantly changed expression in tBHQ treated, splenic CD4<sup>+</sup> cells compared to control ( $p_{\text{nom}} < 0.05$ ). From these, altogether 47 genes were validated back by RT-PCR (marked with bold asterisk [\*])

| Up-regulated genes        |           |           | Down-regulated genes  |           |           |
|---------------------------|-----------|-----------|-----------------------|-----------|-----------|
| GeneName                  | logFC     | adj.P.Val | GeneName              | logFC     | adj.P.Val |
| <b><i>Stfa1</i>*</b>      | 3.9064895 | 0.0169437 | <i>Ubn1</i>           | -0.391629 | 0.0497032 |
| <i>LOC433016</i>          | 3.7924452 | 0.0169437 | <i>Cenpl</i>          | -0.400142 | 0.0490856 |
| <i>Stfa2l1</i>            | 3.5874328 | 0.0169437 | <i>Chic2</i>          | -0.426049 | 0.0429823 |
| <i>ENSMUST00000077110</i> | 3.4803365 | 0.0162617 | <i>Serbp1</i>         | -0.429634 | 0.0462228 |
| <i>2300002D11Rik</i>      | 3.3350887 | 0.0409651 | <i>Cenpa</i>          | -0.446086 | 0.0408644 |
| <i>Hp</i>                 | 3.0378437 | 0.0208273 | <i>Amd1</i>           | -0.482322 | 0.0415054 |
| <b><i>Stfa2</i>*</b>      | 2.9227256 | 0.0169437 | <i>Camk2a</i>         | -0.485021 | 0.0445632 |
| <i>Retnlg</i>             | 2.9129956 | 0.02052   | <i>0610040D20Rik</i>  | -0.485044 | 0.0391519 |
| <i>Il8rb</i>              | 2.8891376 | 0.0107003 | <i>Rybp</i>           | -0.504705 | 0.0385746 |
| <b><i>Mmp8</i>*</b>       | 2.8853301 | 0.0169437 | <i>Sh3rf1</i>         | -0.504826 | 0.0499011 |
| <i>Cxcl2</i>              | 2.8182754 | 0.0379543 | <i>Usp38</i>          | -0.506739 | 0.0348195 |
| <i>Clec4e</i>             | 2.7445173 | 0.0324984 | <i>Lemd3</i>          | -0.50696  | 0.0430313 |
| <i>Il8rb</i>              | 2.6500234 | 0.0162617 | <i>Siah2</i>          | -0.508708 | 0.0480091 |
| <i>Clec4d</i>             | 2.5828577 | 0.0310919 | <i>Dnajb6</i>         | -0.517009 | 0.0244566 |
| <i>Chi3l1</i>             | 2.4505219 | 0.02052   | <i>Prickle1</i>       | -0.518386 | 0.0395634 |
| <b><i>S100a8</i>*</b>     | 2.4212595 | 0.0107003 | <i>3230401D17Rik</i>  | -0.518576 | 0.0265968 |
| <i>G0s2</i>               | 2.3701683 | 0.0199841 | <i>Bcl10</i>          | -0.518704 | 0.0310919 |
| <b><i>s100a9</i>*</b>     | 2.3268041 | 0.0169437 | <i>AK013994</i>       | -0.526674 | 0.0461562 |
| <i>Ppp1r3d</i>            | 2.3008787 | 0.0204766 | <b><i>Tipr1</i>*</b>  | -0.539461 | 0.0408163 |
| <b><i>Lcn2</i>*</b>       | 2.2997459 | 0.0204857 | <i>Pde4b</i>          | -0.541338 | 0.0435927 |
| <b><i>Trem3</i>*</b>      | 2.27623   | 0.0169437 | <i>Peg12</i>          | -0.545333 | 0.0482127 |
| <i>Chi3l3</i>             | 2.2595454 | 0.0491891 | <i>1810009J06Rik</i>  | -0.545503 | 0.0406771 |
| <i>Csf3r</i>              | 2.2523436 | 0.0208386 | <i>Srfbp1</i>         | -0.546509 | 0.0435377 |
| <i>Mrgpra2</i>            | 2.2362744 | 0.0169437 | <i>Dnajb6</i>         | -0.548789 | 0.0337991 |
| <b><i>Mmp9</i>*</b>       | 2.1942358 | 0.0107003 | <i>Rkhd3</i>          | -0.558443 | 0.0379543 |
| <b><i>Gad1</i>*</b>       | 2.1500906 | 0.0169437 | <i>Tgif2</i>          | -0.565342 | 0.046275  |
| <i>Arg2</i>               | 2.0986002 | 0.0107003 | <i>1700054N08Rik</i>  | -0.573559 | 0.0234741 |
| <b><i>Trem1</i>*</b>      | 2.0639241 | 0.0236857 | <i>Klra3</i>          | -0.577878 | 0.0360263 |
| <i>1100001G20Rik</i>      | 2.0575514 | 0.0216319 | <b><i>P2ry14</i>*</b> | -0.582939 | 0.035137  |
| <i>Hdc</i>                | 1.8824383 | 0.037632  | <i>Sox4</i>           | -0.583874 | 0.0411697 |

|                      |           |           |                      |           |           |
|----------------------|-----------|-----------|----------------------|-----------|-----------|
| <i>Nfe2</i>          | 1.8673312 | 0.008929  | <i>NAP007437-001</i> | -0.584212 | 0.0360263 |
| <i>Emilin2</i>       | 1.8174195 | 0.0204766 | <i>Gem</i>           | -0.587821 | 0.0424369 |
| <i>BC089618</i>      | 1.8101363 | 0.026206  | <i>Rngtt</i>         | -0.589558 | 0.0370012 |
| <i>Alox5*</i>        | 1.7709131 | 0.0204766 | <i>Dapp1</i>         | -0.590742 | 0.0264522 |
| <i>Lrg1</i>          | 1.7523144 | 0.0304426 | <i>Slc22a2</i>       | -0.596808 | 0.0497032 |
| <i>Ccl6*</i>         | 1.703382  | 0.0179544 | <i>Ptprf</i>         | -0.597726 | 0.0264522 |
| <i>Lilrb4</i>        | 1.6770058 | 0.0149756 | <i>Kbtbd2</i>        | -0.600365 | 0.0332443 |
| <i>Dfna5h</i>        | 1.6426888 | 0.02052   | <i>Glt28d2</i>       | -0.601611 | 0.0480091 |
| <i>Mtus1</i>         | 1.5887229 | 0.0216319 | <i>Hbs1l</i>         | -0.604691 | 0.0264522 |
| <i>Cebpd</i>         | 1.5652603 | 0.0204857 | <i>C030040K24Rik</i> | -0.612019 | 0.0424333 |
| <i>Chi3l4</i>        | 1.4962512 | 0.0373994 | <i>Tob2</i>          | -0.62171  | 0.0310919 |
| <i>Fndc1</i>         | 1.4674064 | 0.0199841 | <i>Grb7</i>          | -0.637942 | 0.040137  |
| <i>Alox5*</i>        | 1.4654162 | 0.0317135 | <i>Bhlhb2</i>        | -0.638606 | 0.0208386 |
| <i>Il1rn*</i>        | 1.4345521 | 0.0230512 | <i>Myb</i>           | -0.649523 | 0.0215293 |
| <i>Padi4</i>         | 1.4258104 | 0.0424369 | <i>Hmgn3</i>         | -0.662442 | 0.0480091 |
| <i>Mt1</i>           | 1.4242178 | 0.0469002 | <i>Ptprf</i>         | -0.671418 | 0.0289639 |
| <i>Fpr-rs2</i>       | 1.4077917 | 0.0199841 | <i>Atf3</i>          | -0.678332 | 0.0310919 |
| <i>Pi16</i>          | 1.4067729 | 0.03911   | <i>Otud1</i>         | -0.680716 | 0.0217045 |
| <i>Emilin2</i>       | 1.4062323 | 0.0241828 | <i>Ifi80</i>         | -0.691938 | 0.0356522 |
| <i>2300003P22Rik</i> | 1.402857  | 0.0208273 | <i>Skil</i>          | -0.692136 | 0.046919  |
| <i>Mtus1</i>         | 1.4020095 | 0.0230512 | <i>Riok1</i>         | -0.694497 | 0.040137  |
| <i>Tnfaip2</i>       | 1.3847628 | 0.0359041 | <i>Tieg3</i>         | -0.695883 | 0.0445632 |
| <i>Klra2</i>         | 1.3470671 | 0.0264522 | <i>Pik3r3</i>        | -0.707284 | 0.0482127 |
| <i>Fpr1</i>          | 1.2951568 | 0.0351075 | <i>Ube1l2</i>        | -0.71087  | 0.0406771 |
| <i>Ms4a8a</i>        | 1.2753775 | 0.0292462 | <i>Jmy</i>           | -0.71449  | 0.0469002 |
| <i>Siglece</i>       | 1.265304  | 0.008929  | <i>BC057022</i>      | -0.729287 | 0.0208386 |
| <i>Mrap</i>          | 1.2580866 | 0.0199841 | <i>Dyrk3</i>         | -0.738454 | 0.0241828 |
| <i>Gcnt2</i>         | 1.2471069 | 0.0365111 | <i>Hpse</i>          | -0.743195 | 0.0334709 |
| <i>A530064D06Rik</i> | 1.2435046 | 0.0179544 | <i>9630054F20Rik</i> | -0.746661 | 0.0199841 |
| <i>Ifitm1*</i>       | 1.2428823 | 0.0216319 | <i>D230015J17Rik</i> | -0.75302  | 0.0395634 |
| <i>Edn1</i>          | 1.2405578 | 0.0359041 | <i>Efnb2</i>         | -0.75834  | 0.0241828 |
| <i>5730557B15Rik</i> | 1.2404816 | 0.0424369 | <i>Tnfsf11</i>       | -0.76561  | 0.0434025 |
| <i>Nup155</i>        | 1.2339759 | 0.0204857 | <i>Zfyve28</i>       | -0.772459 | 0.0208386 |
| <i>Cd33*</i>         | 1.2316716 | 0.0365111 | <i>Lrrc16</i>        | -0.779191 | 0.0346277 |
| <i>Mboat2</i>        | 1.2297455 | 0.0208386 | <i>5730596K20Rik</i> | -0.781622 | 0.0236857 |
| <i>Sfxn5</i>         | 1.2135636 | 0.0415054 | <i>Mogat1</i>        | -0.782331 | 0.0216319 |
| <i>Gzmb</i>          | 1.2117054 | 0.0422067 | <i>Fosl2</i>         | -0.790418 | 0.0264522 |
| <i>Ms4a6d</i>        | 1.1988909 | 0.0334709 | <i>Frat2</i>         | -0.805562 | 0.0179544 |
| <i>Slfn3</i>         | 1.181386  | 0.0389148 | <i>Foxj3</i>         | -0.823862 | 0.0323347 |
| <i>2810417M05Rik</i> | 1.1796615 | 0.0264522 | <i>Crem</i>          | -0.85436  | 0.0463652 |
| <i>Tgfb1</i>         | 1.1743436 | 0.0169437 | <i>Rel</i>           | -0.85632  | 0.0480807 |
| <i>Ifitm2*</i>       | 1.1740416 | 0.0179544 | <i>Tnfrsf17</i>      | -0.861409 | 0.0264522 |
| <i>BC055004</i>      | 1.1692564 | 0.0466345 | <i>Zfand2a</i>       | -0.863498 | 0.0261117 |
| <i>Slc16a3</i>       | 1.1640191 | 0.0241828 | <i>2310050B05Rik</i> | -0.899224 | 0.0445632 |
| <i>Padi4</i>         | 1.1560191 | 0.0409659 | <i>Plk2</i>          | -0.904059 | 0.0304426 |

|                |           |           |                |           |           |
|----------------|-----------|-----------|----------------|-----------|-----------|
| <b>Cd14*</b>   | 1.1540813 | 0.0179544 | <b>Dusp4*</b>  | -0.913381 | 0.0354384 |
| AK087372       | 1.151899  | 0.0329407 | <b>Nfil3*</b>  | -0.914336 | 0.0409659 |
| <b>Mmp7*</b>   | 1.146066  | 0.0216319 | <i>Tnfsf4</i>  | -0.915992 | 0.0265968 |
| <i>Stac2</i>   | 1.1384134 | 0.0236221 | <i>Slco4a1</i> | -0.925644 | 0.0318903 |
| <i>Ms4a11</i>  | 1.1302852 | 0.0304426 | <b>Dusp4*</b>  | -0.952144 | 0.0169437 |
| <b>Drd3*</b>   | 1.1149364 | 0.0360263 | <i>Tmem163</i> | -0.958325 | 0.0387303 |
| LOC384622      | 1.110668  | 0.0199841 | <i>Snf1lk</i>  | -0.979634 | 0.0169437 |
| <b>Apoe*</b>   | 1.1101803 | 0.0179544 | <i>Nfil3</i>   | -1.010053 | 0.02052   |
| 0610040J01Rik  | 1.109578  | 0.0379543 | <i>Hey1</i>    | -1.028181 | 0.0495035 |
| <i>Gnaz</i>    | 1.1011279 | 0.0289639 | 9830130M13Rik  | -1.149571 | 0.0478532 |
| <b>Pla2g7*</b> | 1.0815618 | 0.0268795 | <i>Slc41a2</i> | -1.210258 | 0.0199841 |
| <b>Ccr12*</b>  | 1.0814998 | 0.0359041 | <i>Hs3st1</i>  | -1.218633 | 0.0424369 |
| <i>Myo18b</i>  | 1.0793971 | 0.0485988 | <b>Dusp14*</b> | -1.227388 | 0.0230512 |
| <i>Slc11a1</i> | 1.072413  | 0.0208273 | <i>Klk1b4</i>  | -1.237813 | 0.0463652 |
| 2310005C01Rik  | 1.0722742 | 0.0337991 | <i>Zc3h12c</i> | -1.256982 | 0.0199841 |
| <i>Clqa</i>    | 1.062227  | 0.0199841 | <i>Mgl1</i>    | -1.411163 | 0.0208273 |
| 3230401I01Rik  | 1.0601258 | 0.0200108 | <b>Dusp10*</b> | -1.419826 | 0.0107003 |
| <i>Syn2</i>    | 1.0577219 | 0.0334709 | <i>Gzma</i>    | -1.424467 | 0.0264522 |
| <i>Hs3st2</i>  | 1.0513419 | 0.0310919 | <i>Epha2</i>   | -1.444171 | 0.0199841 |
| <b>Il1b*</b>   | 1.0480056 | 0.0482127 | 2210020M01Rik  | -1.516391 | 0.0264522 |
| <i>Lrp1</i>    | 1.0403633 | 0.0215201 | <i>Klk1b5</i>  | -1.585054 | 0.0433009 |
| <i>Ier3</i>    | 1.0387872 | 0.0310919 | <i>Upb1</i>    | -1.59126  | 0.0241828 |
| AI452102       | 1.0372    | 0.0264522 | <i>Siglech</i> | -1.695752 | 0.0409659 |
| 9830107B12Rik  | 1.0362593 | 0.0318903 | <b>Cd209d*</b> | -1.78035  | 0.0230512 |
| <i>Clqb</i>    | 1.0350895 | 0.0346277 | <i>Cox6a2</i>  | -1.809345 | 0.033583  |
| <i>Clec7a</i>  | 1.0304137 | 0.0409651 |                |           |           |
| <i>Ifitm2</i>  | 1.0288298 | 0.026206  |                |           |           |
| <i>C6</i>      | 1.0250447 | 0.0406771 |                |           |           |
| <i>Gas6</i>    | 1.0244309 | 0.0290369 |                |           |           |
| <b>Mgst1*</b>  | 1.0233708 | 0.0230512 |                |           |           |
| <i>Sepn1</i>   | 1.023357  | 0.0208386 |                |           |           |
| LOC676870      | 1.0232467 | 0.0356522 |                |           |           |
| 6030422H21Rik  | 1.0144226 | 0.0208273 |                |           |           |
| <i>Pira3</i>   | 1.0008394 | 0.0208386 |                |           |           |
| <i>Adams20</i> | 0.9989663 | 0.0424369 |                |           |           |
| <b>Pira6*</b>  | 0.9986171 | 0.0497032 |                |           |           |
| C130076O07Rik  | 0.9926432 | 0.0179544 |                |           |           |
| <i>Centd3</i>  | 0.9923345 | 0.0406771 |                |           |           |
| <i>Mgst1</i>   | 0.9779364 | 0.0408644 |                |           |           |
| <i>Pdgfc</i>   | 0.9761474 | 0.0489969 |                |           |           |
| <i>Cyp4f18</i> | 0.9730086 | 0.0204766 |                |           |           |
| <i>Pira3</i>   | 0.96965   | 0.0204857 |                |           |           |
| <i>Tspan4</i>  | 0.9643841 | 0.0200108 |                |           |           |
| <i>Pax6</i>    | 0.9584796 | 0.032949  |                |           |           |
| <i>Sult1a1</i> | 0.9559812 | 0.0334709 |                |           |           |

|                           |           |           |  |  |  |
|---------------------------|-----------|-----------|--|--|--|
| <i>Pygl</i>               | 0.9442645 | 0.0406771 |  |  |  |
| <i>Lgmn</i>               | 0.9439797 | 0.0265208 |  |  |  |
| <i>Lhfp</i>               | 0.9433504 | 0.0354384 |  |  |  |
| <i>Pilra</i>              | 0.9322316 | 0.0395634 |  |  |  |
| <i>Rab3il1</i>            | 0.9315289 | 0.0169437 |  |  |  |
| <i>Kcnj16</i>             | 0.927932  | 0.0334709 |  |  |  |
| <i>2310076L09Rik</i>      | 0.9270255 | 0.0318903 |  |  |  |
| <b><i>Il13ra1*</i></b>    | 0.9225341 | 0.0360263 |  |  |  |
| <i>Sepx1</i>              | 0.9184596 | 0.0445632 |  |  |  |
| <i>Fcgr3</i>              | 0.9175912 | 0.0365111 |  |  |  |
| <i>Mt1</i>                | 0.9158274 | 0.0228018 |  |  |  |
| <b><i>Cav1*</i></b>       | 0.9043254 | 0.0369571 |  |  |  |
| <b><i>Ptgs2*</i></b>      | 0.8921205 | 0.0265208 |  |  |  |
| <b><i>P2ry2*</i></b>      | 0.8916829 | 0.0264522 |  |  |  |
| <i>C130050O18Rik</i>      | 0.8906791 | 0.0264522 |  |  |  |
| <b><i>Nr1h3*</i></b>      | 0.8889046 | 0.0264522 |  |  |  |
| <i>Tnfrsf13</i>           | 0.8804367 | 0.0462228 |  |  |  |
| <i>1200002N14Rik</i>      | 0.8796729 | 0.0199841 |  |  |  |
| <i>LOC381484</i>          | 0.8791967 | 0.0354384 |  |  |  |
| <i>Ptplad2</i>            | 0.8612147 | 0.0256834 |  |  |  |
| <i>Fut7</i>               | 0.861012  | 0.0379543 |  |  |  |
| <i>Lypla3</i>             | 0.8600306 | 0.0462228 |  |  |  |
| <i>Hfe</i>                | 0.8493904 | 0.026206  |  |  |  |
| <i>Myo1d</i>              | 0.8474245 | 0.0365111 |  |  |  |
| <i>Foxo3a</i>             | 0.8466951 | 0.0433009 |  |  |  |
| <i>Ptgs1</i>              | 0.8414499 | 0.0370951 |  |  |  |
| <b><i>Tirap*</i></b>      | 0.8337591 | 0.0379543 |  |  |  |
| <i>Csf1r</i>              | 0.832827  | 0.0429823 |  |  |  |
| <i>Hck</i>                | 0.8316354 | 0.0179544 |  |  |  |
| <i>Csf1r</i>              | 0.8272789 | 0.0310919 |  |  |  |
| <i>Slc45a3</i>            | 0.8199816 | 0.0204766 |  |  |  |
| <i>Vcam1</i>              | 0.8125966 | 0.0395634 |  |  |  |
| <i>8030453O22Rik</i>      | 0.8102447 | 0.0409651 |  |  |  |
| <i>Anxa2</i>              | 0.8023203 | 0.0169437 |  |  |  |
| <b><i>Ccl24*</i></b>      | 0.7978902 | 0.0334709 |  |  |  |
| <i>Clec4a2</i>            | 0.7969552 | 0.0304426 |  |  |  |
| <i>Scamp5</i>             | 0.7961883 | 0.0199841 |  |  |  |
| <i>Csf1r</i>              | 0.7938383 | 0.0354384 |  |  |  |
| <i>Plxnb2</i>             | 0.7936975 | 0.0236857 |  |  |  |
| <i>Cab39l</i>             | 0.7883911 | 0.0208386 |  |  |  |
| <i>Jundm2</i>             | 0.7850421 | 0.0169437 |  |  |  |
| <i>Lyzs</i>               | 0.7836424 | 0.0304426 |  |  |  |
| <i>Tirap</i>              | 0.7775237 | 0.0208386 |  |  |  |
| <i>Hk3</i>                | 0.7731507 | 0.0184191 |  |  |  |
| <i>ENSMUST00000039068</i> | 0.7708831 | 0.037219  |  |  |  |

|                       |           |           |  |  |  |
|-----------------------|-----------|-----------|--|--|--|
| <i>Gpd1</i>           | 0.7644566 | 0.0354384 |  |  |  |
| <i>Gcnt1</i>          | 0.756508  | 0.026206  |  |  |  |
| <i>Ccl24</i>          | 0.7499391 | 0.0334709 |  |  |  |
| <i>Osm</i>            | 0.7480422 | 0.02052   |  |  |  |
| <i>Tcn2</i>           | 0.7441501 | 0.0379543 |  |  |  |
| <i>Amhr2</i>          | 0.7428653 | 0.0480807 |  |  |  |
| <i>Pdgfc</i>          | 0.7380453 | 0.0469002 |  |  |  |
| <i>Aldh3b1</i>        | 0.737373  | 0.0409651 |  |  |  |
| <i>Rcsd1</i>          | 0.7366419 | 0.0241828 |  |  |  |
| <i>Gpr141</i>         | 0.7305162 | 0.0169437 |  |  |  |
| <i>Gcnt1</i>          | 0.7297506 | 0.0302708 |  |  |  |
| <i>Dok3</i>           | 0.7248771 | 0.0208386 |  |  |  |
| <b><i>Camk1*</i></b>  | 0.7239797 | 0.0409659 |  |  |  |
| <i>Mertk</i>          | 0.7226912 | 0.0435927 |  |  |  |
| <i>AK036708</i>       | 0.7214743 | 0.0408644 |  |  |  |
| <i>Cr2</i>            | 0.7188317 | 0.0430313 |  |  |  |
| <i>B430306N03Rik</i>  | 0.709819  | 0.0377836 |  |  |  |
| <i>Anxa2</i>          | 0.7078039 | 0.0199841 |  |  |  |
| <i>Scd2</i>           | 0.7054011 | 0.0395634 |  |  |  |
| <i>Ppap2b</i>         | 0.7043332 | 0.0424333 |  |  |  |
| <i>Lgals3</i>         | 0.7022757 | 0.0395634 |  |  |  |
| <i>6430548M08Rik</i>  | 0.7003627 | 0.03911   |  |  |  |
| <i>Hip1</i>           | 0.6990555 | 0.026206  |  |  |  |
| <i>AK041774</i>       | 0.6948503 | 0.0409659 |  |  |  |
| <i>Prfl</i>           | 0.6925697 | 0.0387303 |  |  |  |
| <i>Lilrb3</i>         | 0.6915752 | 0.0358353 |  |  |  |
| <i>Ela1</i>           | 0.6904486 | 0.0343527 |  |  |  |
| <i>Mapk13</i>         | 0.6838903 | 0.0317135 |  |  |  |
| <i>Stard8</i>         | 0.6836808 | 0.0370012 |  |  |  |
| <i>Ncf2</i>           | 0.6823333 | 0.0439583 |  |  |  |
| <i>Ninj1</i>          | 0.6747365 | 0.0179544 |  |  |  |
| <i>Galc</i>           | 0.6710196 | 0.0217501 |  |  |  |
| <i>Popdc2</i>         | 0.6696056 | 0.0260572 |  |  |  |
| <i>Fcer1g</i>         | 0.6690582 | 0.0313892 |  |  |  |
| <i>Nupr1</i>          | 0.6630438 | 0.0478532 |  |  |  |
| <i>Fcer1g</i>         | 0.6598249 | 0.0260572 |  |  |  |
| <i>Ifitm7</i>         | 0.6582268 | 0.0424333 |  |  |  |
| <i>AK038388</i>       | 0.6382835 | 0.0406771 |  |  |  |
| <i>Pfkfb4</i>         | 0.6374585 | 0.0406771 |  |  |  |
| <i>Scarb1</i>         | 0.6315394 | 0.0208386 |  |  |  |
| <i>Tmem106a</i>       | 0.6180528 | 0.0199841 |  |  |  |
| <b><i>Cd300d*</i></b> | 0.6149989 | 0.0411697 |  |  |  |
| <i>TC1486688</i>      | 0.6117544 | 0.0260572 |  |  |  |
| <i>Myh9</i>           | 0.6091942 | 0.0314247 |  |  |  |
| <i>Tia1</i>           | 0.6088532 | 0.0354384 |  |  |  |



|                      |           |           |  |  |  |
|----------------------|-----------|-----------|--|--|--|
| <i>Csf2rb1</i>       | 0.6082428 | 0.0379543 |  |  |  |
| <i>Pctk3</i>         | 0.6079319 | 0.0251503 |  |  |  |
| <i>AK089867</i>      | 0.6061738 | 0.040137  |  |  |  |
| <i>Pstk</i>          | 0.6043853 | 0.0291848 |  |  |  |
| <i>AK045243</i>      | 0.5816074 | 0.0354384 |  |  |  |
| <i>Cd244</i>         | 0.5794334 | 0.0304426 |  |  |  |
| <i>NAP045951-1</i>   | 0.5753181 | 0.040137  |  |  |  |
| <i>Irak3</i>         | 0.5752363 | 0.0497032 |  |  |  |
| <b><i>Comt</i>*</b>  | 0.5720299 | 0.0283388 |  |  |  |
| <i>Lyl1</i>          | 0.5654871 | 0.0387303 |  |  |  |
| <i>D030029J20Rik</i> | 0.5613431 | 0.0424369 |  |  |  |
| <i>NAP029356-1</i>   | 0.5587797 | 0.0408644 |  |  |  |
| <i>C130026L21Rik</i> | 0.5581975 | 0.0445632 |  |  |  |
| <i>Apob48r*</i>      | 0.5575131 | 0.026206  |  |  |  |
| <i>Fgl2</i>          | 0.5385596 | 0.0465107 |  |  |  |
| <i>B230208L21Rik</i> | 0.5305764 | 0.0424369 |  |  |  |
| <i>Tmem37</i>        | 0.5286151 | 0.0390745 |  |  |  |
| <i>Ctsb</i>          | 0.514308  | 0.0406771 |  |  |  |
| <i>D8Erd354e</i>     | 0.5095144 | 0.0459494 |  |  |  |
| <i>Gpr146</i>        | 0.5041779 | 0.0342793 |  |  |  |
| <i>Atp13a2</i>       | 0.5021957 | 0.0334709 |  |  |  |
| <i>Lyn</i>           | 0.4847448 | 0.0289639 |  |  |  |
| <i>Pars2</i>         | 0.4803258 | 0.046229  |  |  |  |
| <i>Rab3a</i>         | 0.4800285 | 0.0464859 |  |  |  |
| <i>Eif4ebp1</i>      | 0.4763669 | 0.0424369 |  |  |  |
| <i>Zfp3</i>          | 0.4747451 | 0.0430313 |  |  |  |
| <i>Tnfrsf19l</i>     | 0.4703432 | 0.0283494 |  |  |  |
| <i>Hectd2</i>        | 0.4681382 | 0.0463652 |  |  |  |
| <i>Ppt2</i>          | 0.4584579 | 0.0360263 |  |  |  |
| <i>Myo7a</i>         | 0.4575087 | 0.0465408 |  |  |  |
| <i>Cd151</i>         | 0.4495158 | 0.0478532 |  |  |  |
| <i>Slc16a10</i>      | 0.4308468 | 0.0444629 |  |  |  |
| <i>Pscd4</i>         | 0.4060573 | 0.0490856 |  |  |  |
| <i>Abcg1</i>         | 0.3776486 | 0.0478532 |  |  |  |



**Supplementary Figure S5. Additional subnetworks from Network analysis.** Nodes represent GO pathways significantly changed in gene set enrichment analysis ( $p < 0.05$ , false discovery rate  $< 0.25$ ). Green nodes represent GO terms, grey edges connection between them. The size of the nodes is proportional with the number of genes in the GO term and the thickness of grey edges represents the number of common genes between two GO terms (FDR=0.25,  $p < 0.05$ , edge cutoff 0.5).

### A. Regulation of cell signaling

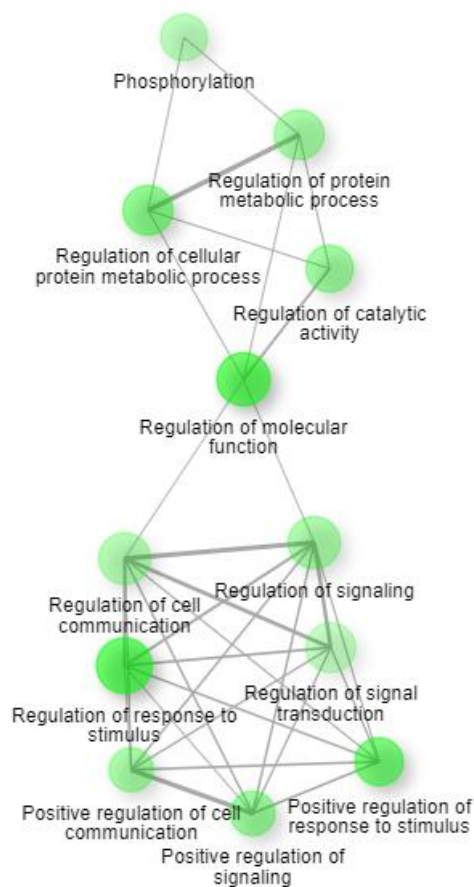

## B. Secretion and transport

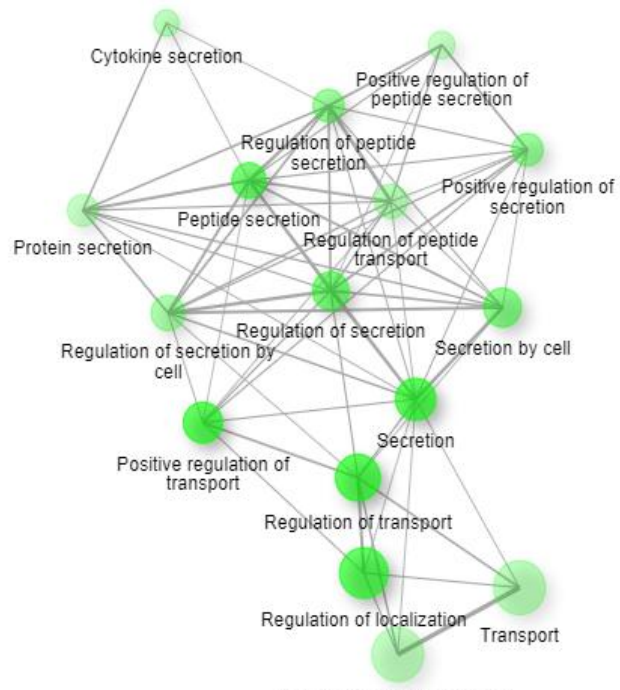

**Supplementary Table S2. Significantly changed GO, KEGG, Reactome, TF, WP and CORUM terms after g:Profiler analysis [64]. Input genes were from Table 1 (significantly changed after tBHQ treatment and those that are related to influenza or SARS-CoV-2). A.) Influenza, B.) SARS-CoV-2.**

**A. Influenza**

| Source       | Term_name                                                                 | Adjusted_p_value |
|--------------|---------------------------------------------------------------------------|------------------|
| <b>GO:BP</b> | inflammatory response                                                     | 5.64E-07         |
| <b>GO:BP</b> | defense response                                                          | 3.17285E-05      |
| <b>GO:MF</b> | prostaglandin-endoperoxide synthase activity                              | 0.000133097      |
| <b>GO:BP</b> | innate immune response                                                    | 0.001645605      |
| <b>WP</b>    | Photodynamic therapy-induced NF-kB survival signaling                     | 0.002947529      |
| <b>GO:BP</b> | immune system process                                                     | 0.00327487       |
| <b>GO:BP</b> | response to other organism                                                | 0.003615254      |
| <b>GO:BP</b> | response to external biotic stimulus                                      | 0.003670657      |
| <b>GO:BP</b> | response to biotic stimulus                                               | 0.00443811       |
| <b>WP</b>    | Fibrin complement receptor 3 signaling pathway                            | 0.005907833      |
| <b>WP</b>    | Prostaglandin synthesis and regulation                                    | 0.00632312       |
| <b>GO:BP</b> | biological process involved in interspecies interaction between organisms | 0.007312913      |
| <b>KEGG</b>  | Transcriptional misregulation in cancer                                   | 0.007621782      |
| <b>GO:BP</b> | defense response to other organism                                        | 0.007698772      |
| <b>GO:BP</b> | cellular response to bacterial lipoprotein                                | 0.010159674      |
| <b>GO:BP</b> | response to bacterial lipopeptide                                         | 0.010159674      |
| <b>GO:BP</b> | cellular response to bacterial lipopeptide                                | 0.010159674      |
| <b>GO:BP</b> | response to bacterium                                                     | 0.010453143      |
| <b>GO:MF</b> | peptidase activity                                                        | 0.018413225      |
| <b>GO:BP</b> | positive regulation of receptor binding                                   | 0.018949096      |
| <b>GO:BP</b> | response to bacterial lipoprotein                                         | 0.018949096      |
| <b>WP</b>    | AGE/RAGE pathway                                                          | 0.019942137      |
| <b>GO:BP</b> | immune response                                                           | 0.021481211      |
| <b>KEGG</b>  | NF-kappa B signaling pathway                                              | 0.023179192      |
| <b>GO:BP</b> | cyclooxygenase pathway                                                    | 0.024353083      |
| <b>GO:BP</b> | regulation of cell migration                                              | 0.029835374      |
| <b>GO:BP</b> | response to lipoteichoic acid                                             | 0.030428808      |
| <b>GO:BP</b> | cellular response to lipoteichoic acid                                    | 0.030428808      |
| <b>GO:BP</b> | regulation of localization                                                | 0.032330113      |
| <b>GO:BP</b> | positive regulation of cell migration                                     | 0.032875638      |
| <b>REAC</b>  | Immune System                                                             | 0.033089112      |
| <b>GO:BP</b> | response to external stimulus                                             | 0.037708531      |
| <b>GO:BP</b> | positive regulation of cell motility                                      | 0.040765128      |
| <b>GO:BP</b> | cell migration                                                            | 0.041761747      |

|              |                                                        |             |
|--------------|--------------------------------------------------------|-------------|
| <b>GO:BP</b> | regulation of cell motility                            | 0.0428563   |
| <b>REAC</b>  | Synthesis of Prostaglandins (PG) and Thromboxanes (TX) | 0.043553629 |
| <b>GO:BP</b> | positive regulation of cellular component movement     | 0.045615296 |
| <b>GO:BP</b> | positive regulation of locomotion                      | 0.046795933 |
| <b>CORUM</b> | COX1 homodimer complex                                 | 0.049947455 |
| <b>CORUM</b> | PTGS2 homodimer complex                                | 0.049947455 |

## B. SARS-CoV2

| Source       | Term_name                                                                 | Adjusted_p_value |
|--------------|---------------------------------------------------------------------------|------------------|
| <b>GO:BP</b> | defense response                                                          | 0.000865474      |
| <b>GO:BP</b> | viral entry into host cell                                                | 0.001508618      |
| <b>GO:BP</b> | entry into host                                                           | 0.001816696      |
| <b>GO:BP</b> | immune response                                                           | 0.00205686       |
| <b>GO:BP</b> | immune system process                                                     | 0.002310072      |
| <b>GO:BP</b> | movement in host environment                                              | 0.002392321      |
| <b>GO:CC</b> | lytic vacuole                                                             | 0.002971444      |
| <b>GO:CC</b> | lysosome                                                                  | 0.002971444      |
| <b>GO:BP</b> | biological process involved in interaction with host                      | 0.003613031      |
| <b>TF</b>    | Factor: Erg; motif: NRRSAGGAAGNGG; match class: 1                         | 0.004826403      |
| <b>GO:CC</b> | vacuole                                                                   | 0.005442771      |
| <b>GO:CC</b> | external side of plasma membrane                                          | 0.006186628      |
| <b>GO:CC</b> | cell surface                                                              | 0.008500716      |
| <b>GO:BP</b> | biological process involved in interspecies interaction between organisms | 0.013102578      |
| <b>GO:CC</b> | endosome lumen                                                            | 0.017800021      |
| <b>GO:BP</b> | biological process involved in symbiotic interaction                      | 0.019718536      |
| <b>GO:BP</b> | defense response to other organism                                        | 0.022349117      |
| <b>WP</b>    | Network map of SARS-CoV-2 signaling pathway                               | 0.026302756      |
| <b>GO:BP</b> | viral life cycle                                                          | 0.029748527      |
| <b>GO:CC</b> | side of membrane                                                          | 0.030316127      |
| <b>GO:BP</b> | response to stress                                                        | 0.035059475      |
| <b>GO:BP</b> | response to external stimulus                                             | 0.035839933      |

**Supplementary Table S3.** Putative AHR and NRF2 binding sites on the genes listed in Table 1. After analysis with GeneHancer, those genes were selected from the list, that had ‘elite’ enhancer–gene relations reflecting both a high-likelihood enhancer definition and a strong enhancer–gene association. A Influenza, B SARS-CoV2

**A. Influenza**

|                                  | <b>AhR</b>                  |                   |                 | <b>Nrf2</b>                 |                   |                 |
|----------------------------------|-----------------------------|-------------------|-----------------|-----------------------------|-------------------|-----------------|
| <b>Gene symbol</b>               | <b>GH Identifier</b>        | <b>GH Type</b>    | <b>GH Score</b> | <b>GH Identifier</b>        | <b>GH Type</b>    | <b>GH Score</b> |
| <i>CtsB</i>                      | <a href="#">GH08J011856</a> | Promoter/Enhancer | 2.1             | <a href="#">GH08J011856</a> | Promoter/Enhancer | 2.1             |
|                                  | <a href="#">GH08J011851</a> | Promoter/Enhancer | 1.6             | <a href="#">GH08J011876</a> | Promoter/Enhancer | 1.9             |
|                                  | <a href="#">H08J011843</a>  | Enhancer          | 1               | -                           | -                 | -               |
| <i>Cd14</i>                      | -                           | -                 | -               | -                           | -                 | -               |
| <i>Cd151</i>                     | <a href="#">GH11J000839</a> | Promoter/Enhancer | 2               | <a href="#">GH11J000824</a> | Promoter/Enhancer | 1.9             |
|                                  | <a href="#">H11J001301</a>  | Promoter/Enhancer | 2.1             | -                           | -                 | -               |
|                                  | <a href="#">GH11J000794</a> | Promoter/Enhancer | 2               | -                           | -                 | -               |
| <i>Cd209d</i>                    | <a href="#">GH19J007521</a> | Promoter/Enhancer | 2.3             | -                           | -                 | -               |
|                                  | <a href="#">GH20J060078</a> | Enhancer          | 0.9             | -                           | -                 | -               |
| <i>Ifitm1</i>                    | <a href="#">GH11J000352</a> | Promoter/Enhancer | 1.6             | -                           | -                 | -               |
| <i>Ifitm2</i>                    | <a href="#">GH11J000352</a> | Promoter/Enhancer | 1.6             | -                           | -                 | -               |
| <i>Cxcr2</i><br>( <i>Il8rb</i> ) | -                           | -                 | -               | -                           | -                 | -               |
| <i>Osm</i>                       | -                           | -                 | -               | <a href="#">GH22J030193</a> | Enhancer          | 1.5             |
|                                  | -                           | -                 | -               | <a href="#">GH22J030201</a> | Promoter/Enhancer | 2.1             |
|                                  | -                           | -                 | -               | <a href="#">GH22J030263</a> | Enhancer          | 1               |
| <i>Padi4</i>                     | -                           | -                 | -               | <a href="#">GH01J017347</a> | Enhancer          | 1               |
| <i>Perforin</i>                  | -                           | -                 | -               | -                           | -                 | -               |
| <i>Ppp1r3d</i>                   | -                           | -                 | -               | <a href="#">GH20J059938</a> | Promoter/Enhancer | 2.2             |
|                                  | -                           | -                 | -               | <a href="#">GH20J060054</a> | Promoter/Enhancer | 1.6             |
| <i>Syn2</i>                      | -                           | -                 | -               | <a href="#">GH03J012191</a> | Enhancer          | 1.3             |

## B. SARS-CoV2

|                                     | Ahr                           |                   |          | Nrf2                        |                   |          |
|-------------------------------------|-------------------------------|-------------------|----------|-----------------------------|-------------------|----------|
| Gene symbol                         | GH Identifier                 | GH Type           | GH Score | GH Identifier               | GH Type           | GH Score |
| <i>Anxa2</i>                        | <a href="#">GH15J060388</a> , | Promoter/Enhancer | 2.1      | <a href="#">GH15J060388</a> | Promoter/Enhancer | 2.1      |
|                                     | <a href="#">H15J060476</a>    | Promoter/Enhancer | 1.9      | <a href="#">GH15J060368</a> | Promoter/Enhancer | 1.5      |
|                                     | -                             | -                 | -        | <a href="#">GH15J060525</a> | Enhancer          | 1.2      |
| <i>Cd14</i>                         | -                             | -                 | -        | -                           |                   |          |
| <i>Dusp10</i>                       | -                             | -                 | -        | <a href="#">GH01J221687</a> | Enhancer          | 1.1      |
|                                     | -                             | -                 | -        | <a href="#">H01J221986</a>  | Enhancer          | 1.4      |
| <i>Fpr-rs2</i>                      | -                             | -                 | -        | -                           | -                 | -        |
| <i>Gzmb</i>                         | -                             | -                 | -        | -                           | -                 | -        |
| <i>Mgl1</i>                         | -                             | -                 | -        | -                           | -                 | -        |
| <i>Mmp7</i>                         | <a href="#">GH15J060388</a> , | Promoter/Enhancer | 2.1      | -                           | -                 | -        |
| <i>Mmp9</i>                         | <a href="#">H15J060476</a>    | Promoter/Enhancer | 1.9      | -                           | -                 | -        |
| <i>Otud</i>                         | -                             | -                 |          | -                           | -                 | -        |
| <i>Ptgs1</i>                        | <a href="#">GH09J122346</a>   | Enhancer          | 1.1      | -                           | -                 | -        |
| <i>Ptgs2</i>                        | -                             | -                 | -        | -                           | -                 | -        |
| <i>Rel</i>                          | <a href="#">H02J061535</a>    | Promoter/Enhancer | 2.3      | <a href="#">GH02J061535</a> | Promoter/Enhancer | 2.3      |
|                                     | <a href="#">H02J061015</a>    | Promoter/Enhancer | 2        |                             |                   |          |
| <i>Tirap</i>                        | <a href="#">GH11J125624</a>   | Promoter/Enhancer | 2        | <a href="#">GH11J126350</a> | Promoter/Enhancer | 2        |
| <i>Trem1</i>                        | -                             | -                 | -        | -                           | -                 | -        |
| <i>Tnfrsf13</i><br>( <i>April</i> ) | <a href="#">H17J007571</a>    | Promoter/Enhancer | 2        | -                           | -                 | -        |
|                                     | <a href="#">GH17J007556</a>   | Promoter/Enhancer | 2        | -                           | -                 | -        |
|                                     | <a href="#">GH17J007347</a>   | Promoter/Enhancer | 2.1      | -                           | -                 | -        |
| <i>Usp38</i>                        | -                             | -                 | -        | <a href="#">GH04J143183</a> | Promoter/Enhancer | 1.8      |
